# Supplementary material for: Porous CuO nanostructure as a reusable catalyst for oxidative degradation of organic water pollutants
Source: Royal Society of Chemistry journal article supplement (doi:10.1039/c5nj02515j), 2015-10-30

**Electronic Supplementary Information**

**Porous CuO nanostructure as reusable catalyst for oxidative  
degradation of organic water pollutants**

**Pangkita Deka, Ramesh C. Deka\* and Pankaj Bharali\***

*Department of Chemical Sciences, Tezpur University, Napaam – 784 028, India*

**Submitted to New Journal of Chemistry**

-----  
\* Corresponding authors: Tel.: +91 3712 275064; fax: +91 3712 267005/6

E-mail address: pankajb@tezu.ernet.in (P. Bharali) and ramesh@tezu.ernet.in (R. C. Deka).

**Figure S1:** Time dependent UV-visible spectra of MB (a) and MO (b) at room temperature, respectively. Conditions: [dye] = 5 mg/L, volume of dye solution = 10 mL, H<sub>2</sub>O<sub>2</sub> = 1 mL and amount of catalyst = 3 mg.

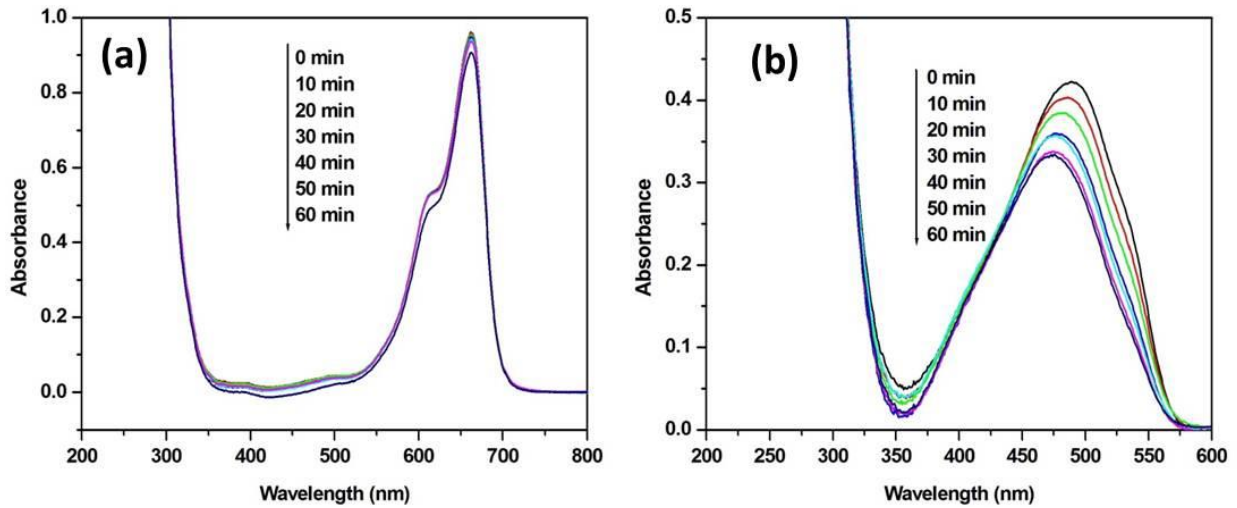

**Figure S2:** Time dependent UV-visible spectra of MB (a) and MO (b) at 35 °C, respectively. Conditions: [dye] = 5 mg/L, volume of dye solution = 10 mL, H<sub>2</sub>O<sub>2</sub> = 1 mL and amount of catalyst = 3 mg.

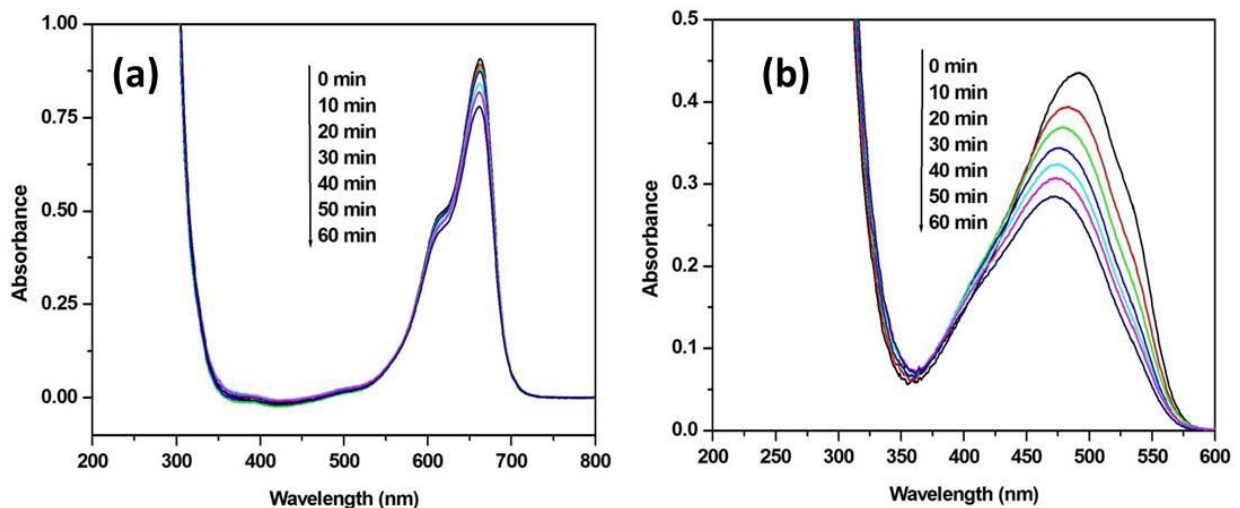

**Figure S3:** Time dependent UV-visible spectra of MB (a) and MO (b) at 65 °C, respectively. Conditions: [dye] = 5 mg/L, volume of dye solution = 10 mL, H<sub>2</sub>O<sub>2</sub> = 1 mL and amount of catalyst = 1 mg.

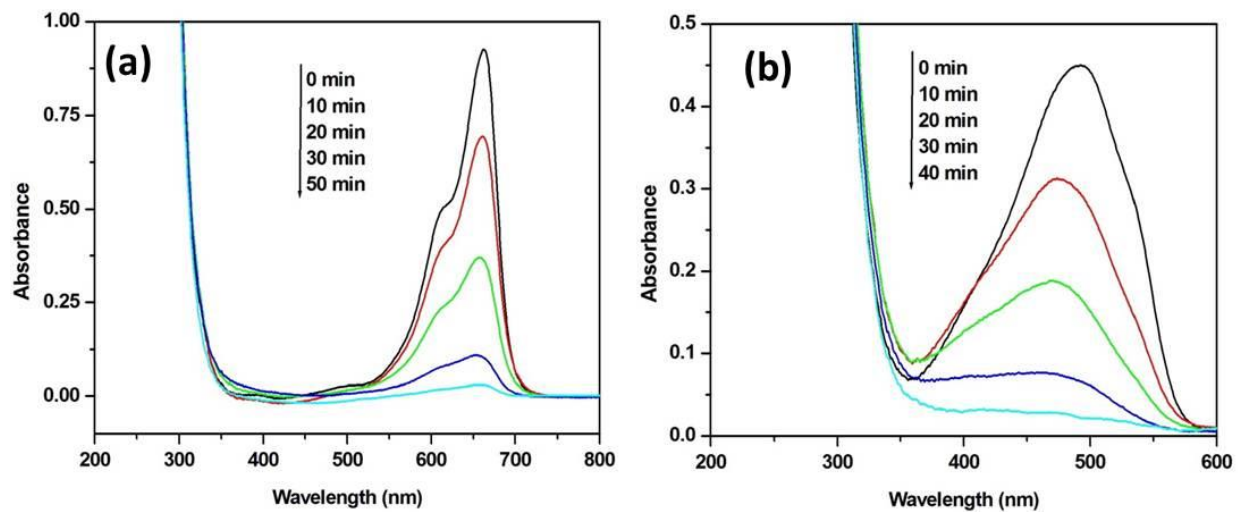

## Recyclability test: Methylene Blue (MB)

**Figure S4:** Time dependent UV-visible spectra of MB at 65 °C (a), plot of MB degradation rate (%) versus the reaction time (b) and plot of  $\ln(A_t/A_0)$  versus reaction time (c), respectively. Conditions: [dye] = 5 mg/L, volume of dye solution = 10 mL,  $H_2O_2$  = 1 mL and amount of catalyst = 6 mg.

### Cycle 1:

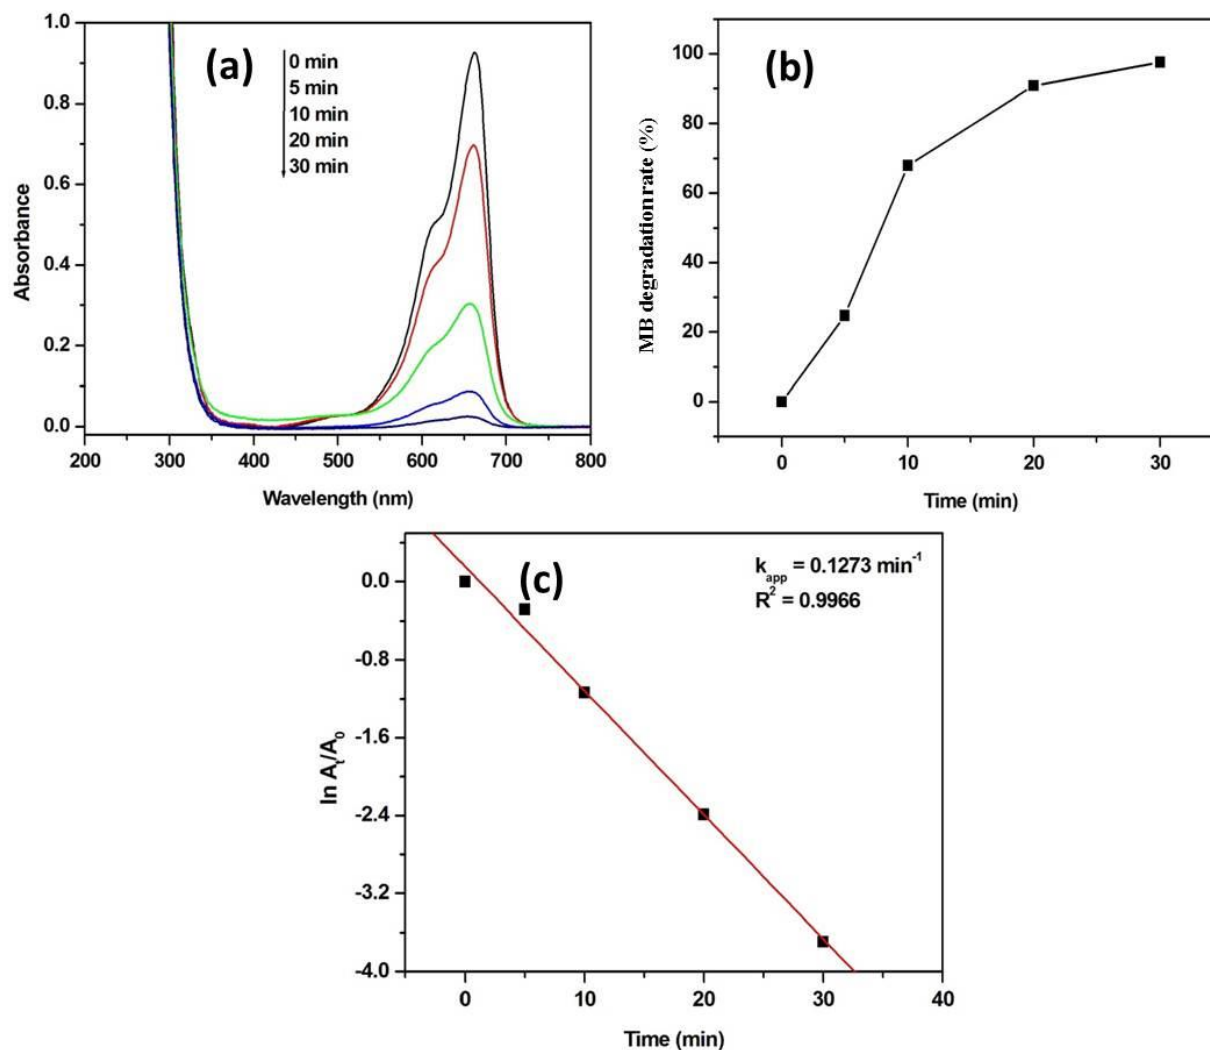

**Figure S5:** Time dependent UV-visible spectra of MB at 65 °C (a), plot of MB degradation rate (%) versus the reaction time (b) and plot of  $\ln(A_t/A_0)$  versus reaction time (c), respectively. Conditions: [dye] = 5 mg/L, volume of dye solution = 10 mL,  $H_2O_2$  = 1 mL and amount of catalyst = 6 mg.

**Cycle 2:**

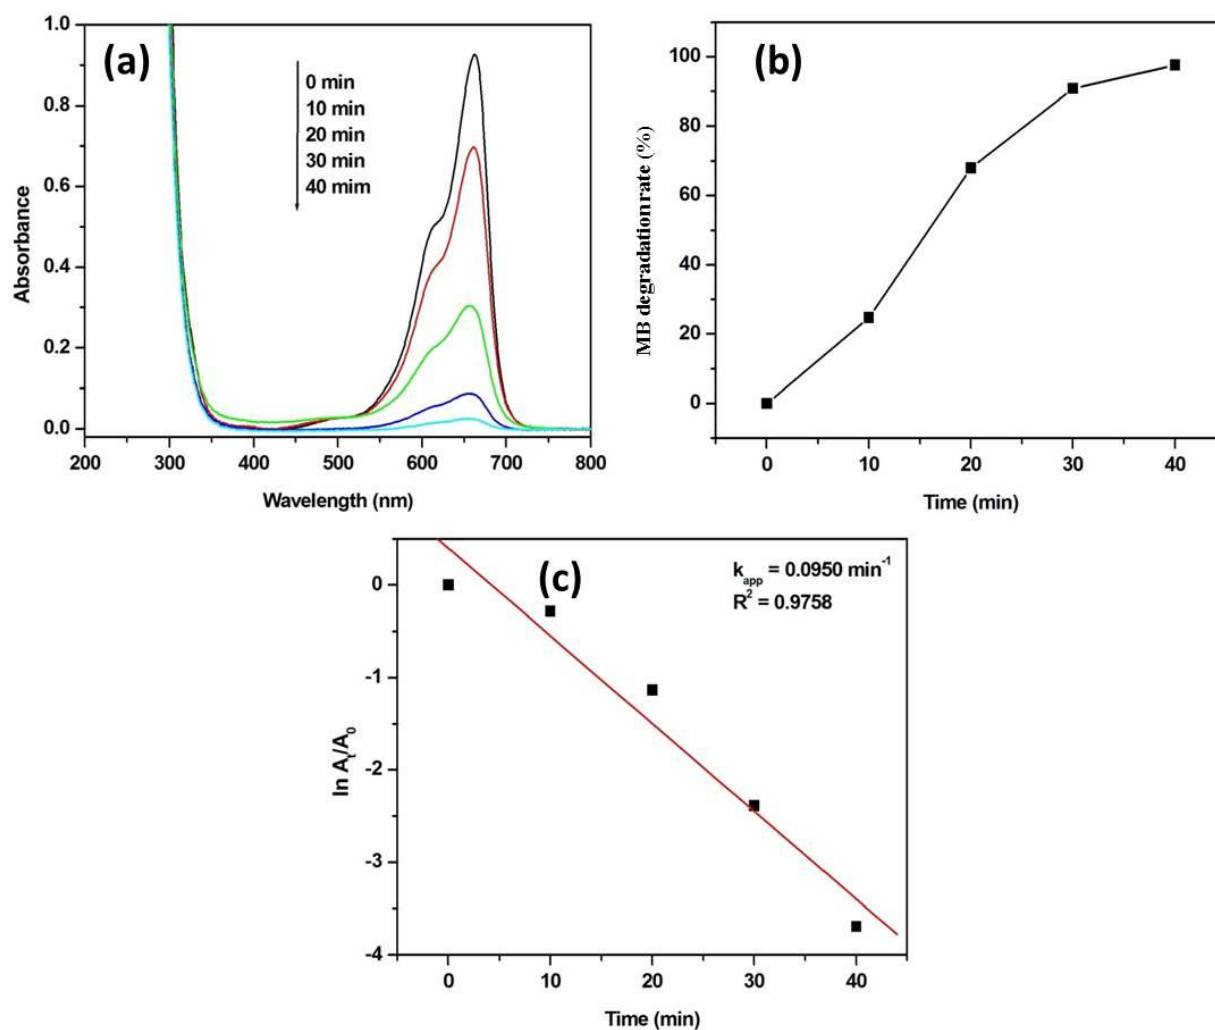

**Figure S6:** Time dependent UV-visible spectra of MB at 65 °C (a), plot of MB degradation rate (%) versus the reaction time (b) and plot of  $\ln(A_t/A_0)$  versus reaction time (c), respectively. Conditions: [dye] = 5 mg/L, volume of dye solution = 10 mL,  $H_2O_2$  = 1 mL and amount of catalyst = 6 mg.

**Cycle 3:**

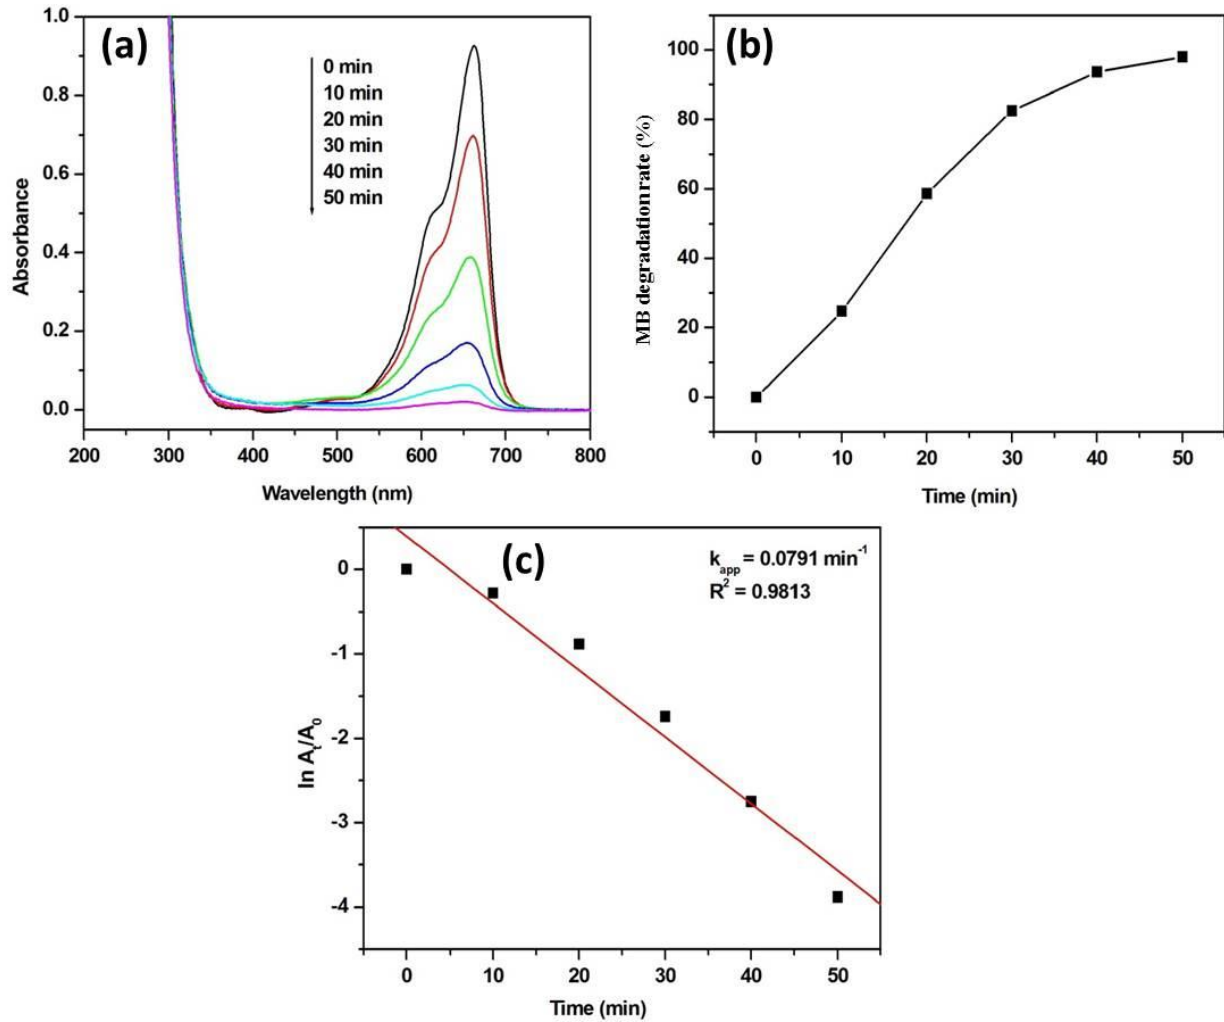

**Figure S7:** Time dependent UV-visible spectra of MB at 65 °C (a), plot of MB degradation rate (%) versus the reaction time (b) and plot of  $\ln(A_t/A_0)$  versus reaction time (c), respectively. Conditions: [dye] = 5 mg/L, volume of dye solution = 10 mL,  $H_2O_2$  = 1 mL and amount of catalyst = 6 mg.

**Cycle 4:**

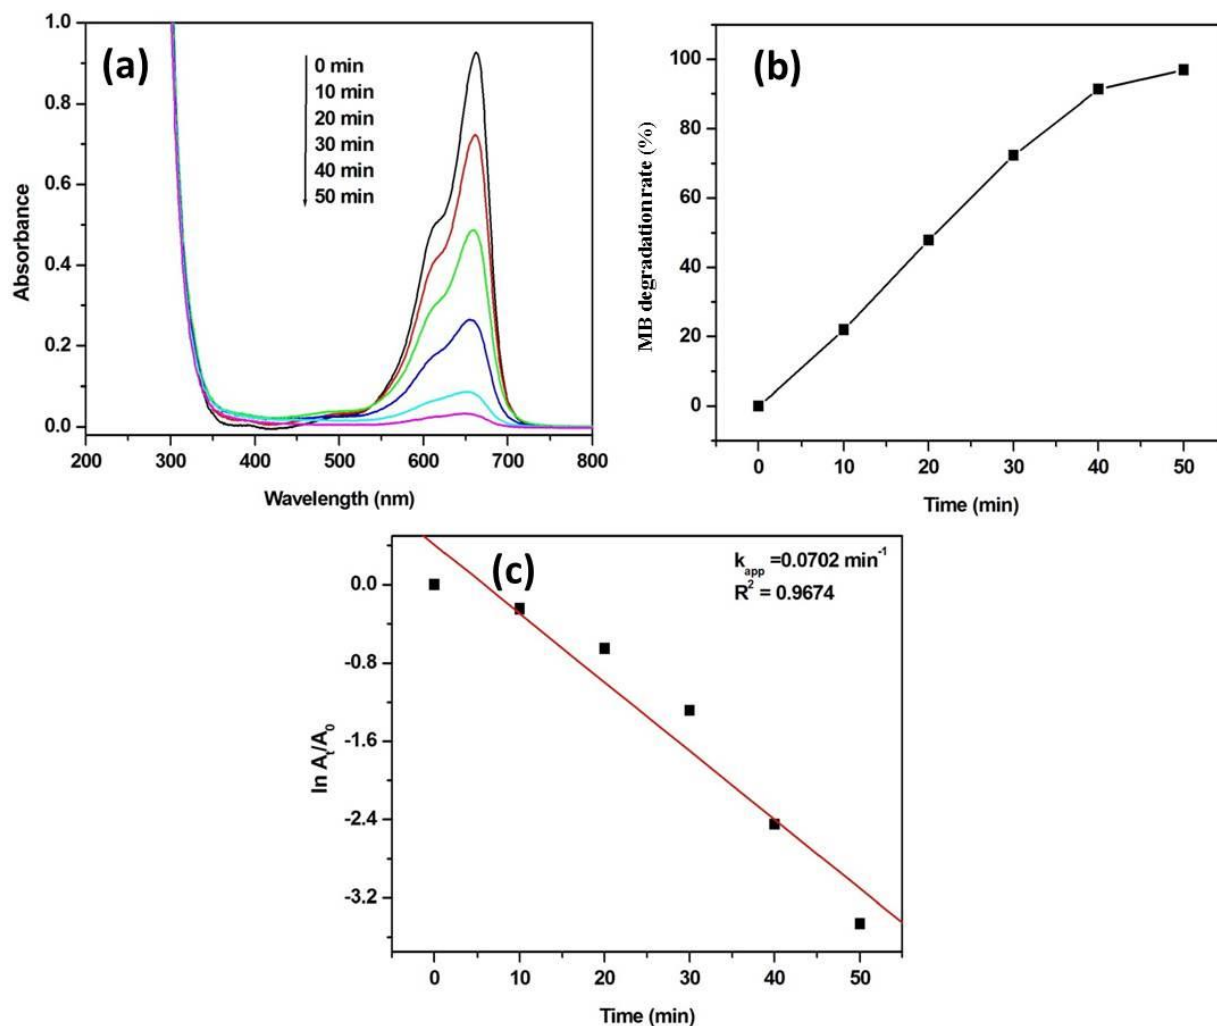

## Recyclability test: Methyl Orange (MO)

**Figure S8:** Time dependent UV-visible spectra of MO at 65 °C (a), plot of MO degradation rate (%) versus the reaction time (b) and plot of  $\ln(A_t/A_0)$  versus reaction time (c), respectively. Conditions: [dye] = 5 mg/L, volume of dye solution = 10 mL,  $H_2O_2$  = 1 mL and amount of catalyst = 6 mg.

### Cycle 1:

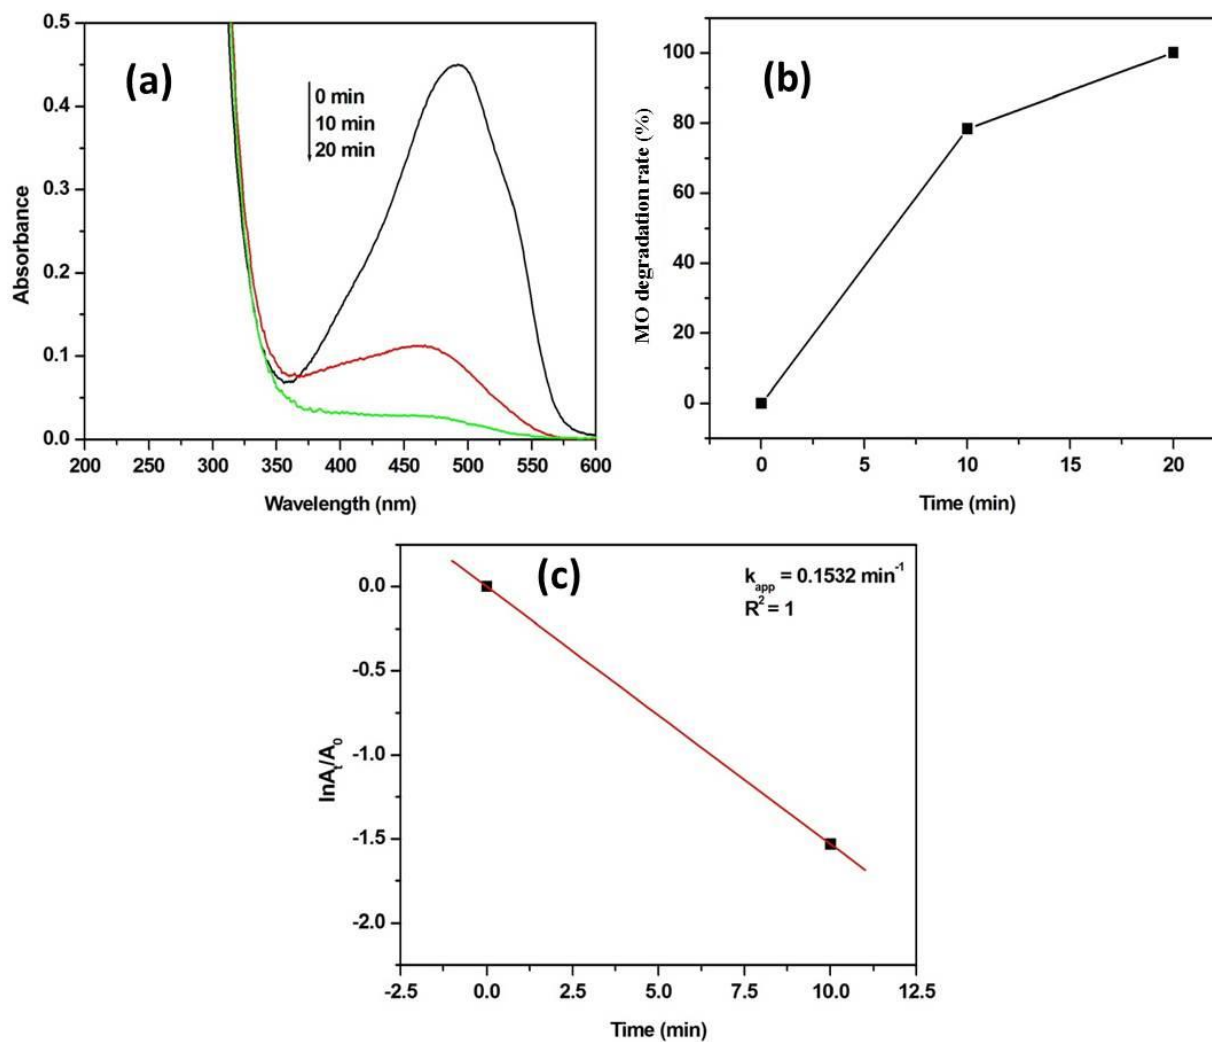



**Figure S9:** Time dependent UV-visible spectra of MO at 65 °C (a), plot of MO degradation rate (%) versus the reaction time (b) and plot of  $\ln(A_t/A_0)$  versus reaction time (c), respectively. Conditions: [dye] = 5 mg/L, volume of dye solution = 10 mL,  $H_2O_2$  = 1 mL and amount of catalyst = 6 mg.

**Cycle 2:**

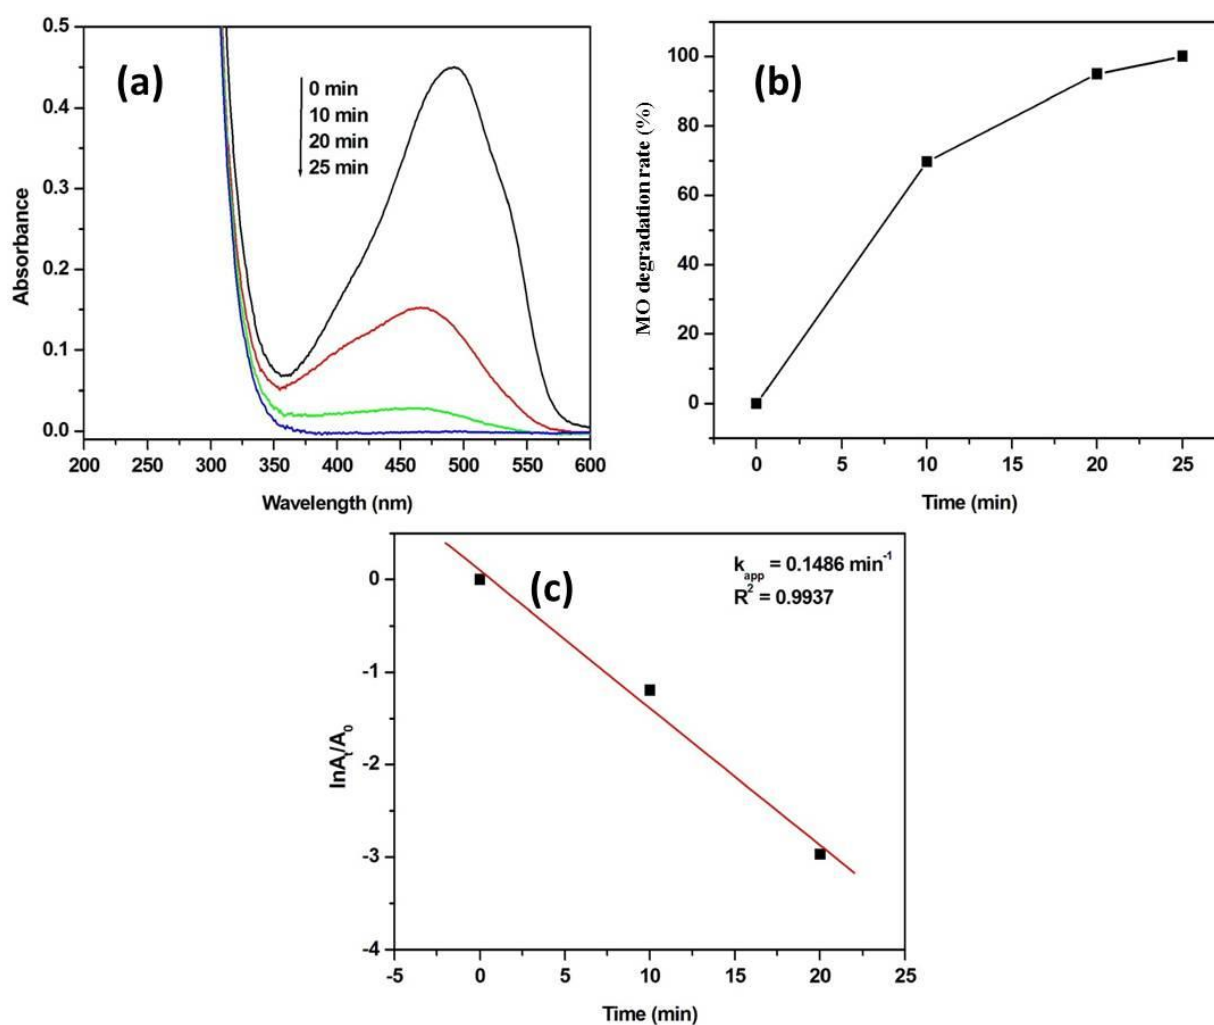

**Figure S10:** Time dependent UV-visible spectra of MO at 65 °C (a), plot of MO degradation rate (%) versus the reaction time (b) and plot of  $\ln(A_t/A_0)$  versus reaction time (c), respectively. Conditions: [dye] = 5 mg/L, volume of dye solution = 10 mL,  $H_2O_2$  = 1 mL and amount of catalyst = 6 mg.

**Cycle 3:**

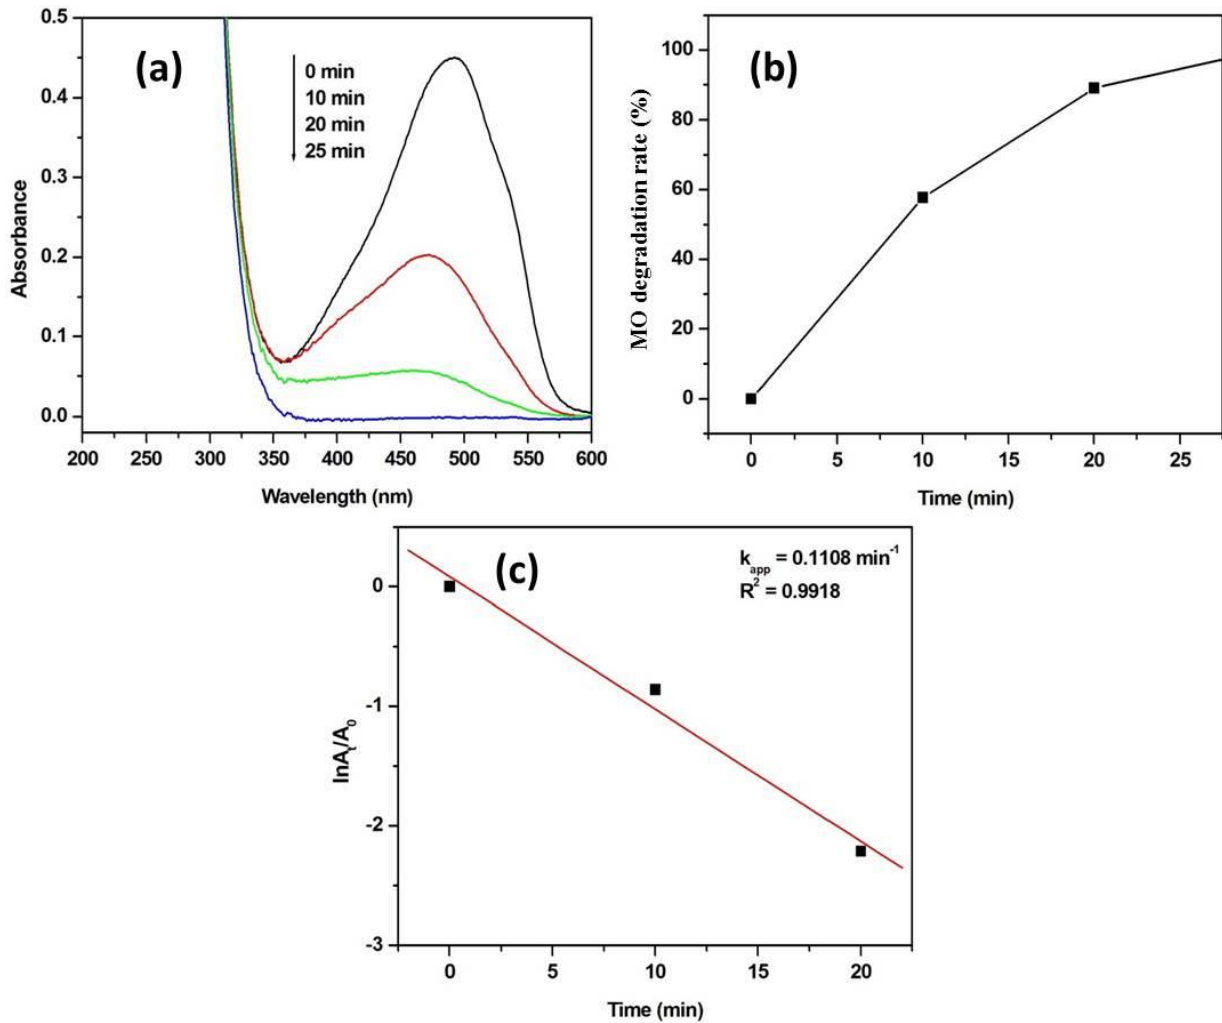

**Figure S11:** Time dependent UV-visible spectra of MO at 65 °C (a), plot of MO degradation rate (%) versus the reaction time (b) and plot of  $\ln(A_t/A_0)$  versus reaction time (c), respectively. Conditions: [dye] = 5 mg/L, volume of dye solution = 10 mL,  $H_2O_2$  = 1 mL and amount of catalyst = 6 mg.

**Cycle 4:**

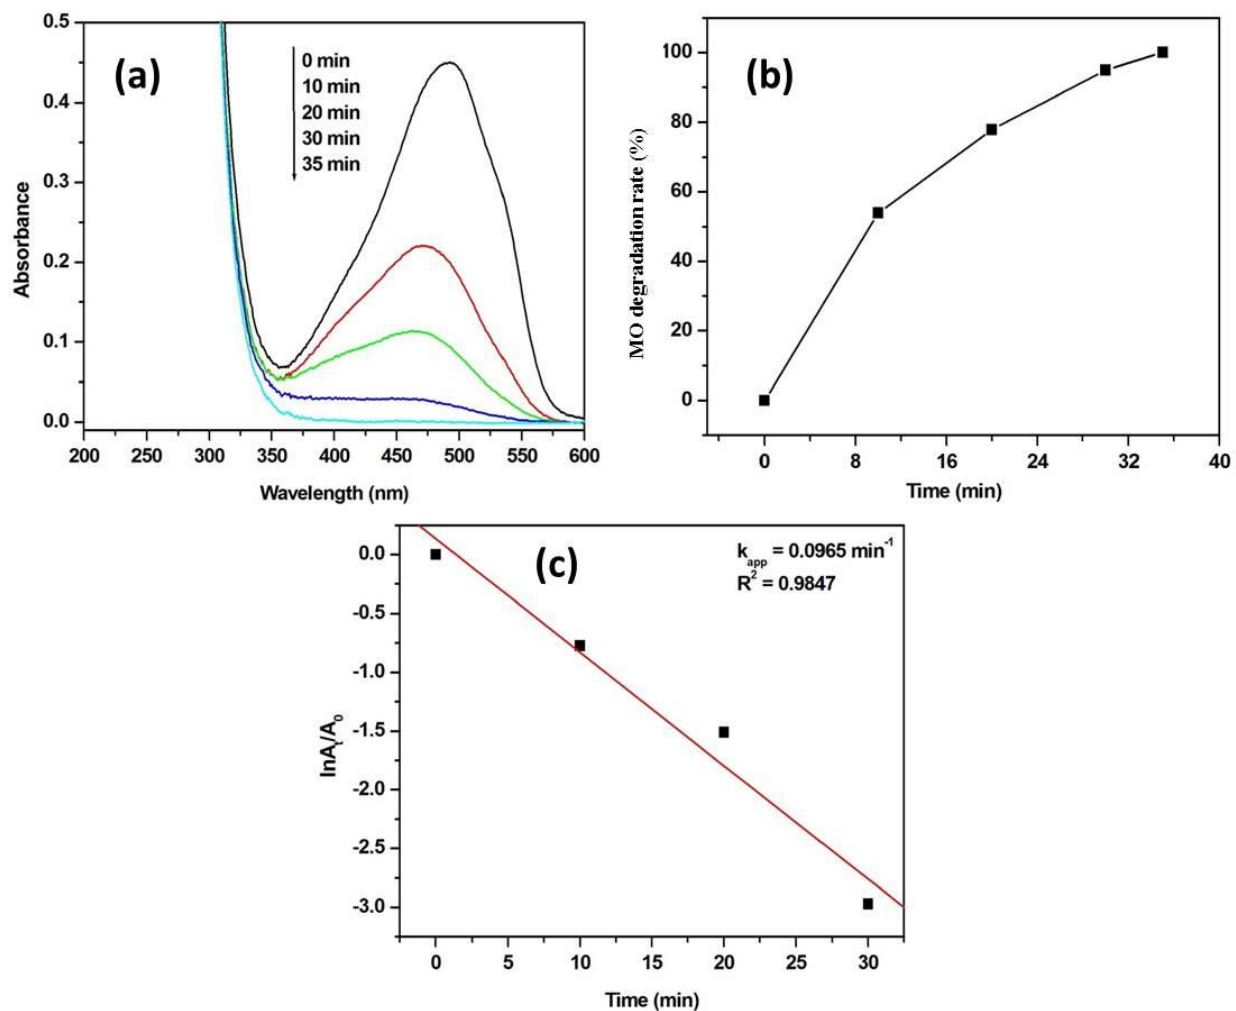

Supplement: c5nj02515j1.pdf [file c5nj02515j1.pdf]
